1 **FANCD2 Alleviates Physiologic Replication Stress in Fetal Liver HSC**

2

3 Makiko Mochizuki-Kashio<sup>1,3</sup>, Young me Yoon<sup>2</sup>, Theresa Menna<sup>4</sup>, Markus Grompe<sup>1</sup> and Peter  
4 Kurre<sup>4</sup>

5 <sup>1</sup>Department of Pediatrics, Papé Family Pediatric Research Institute, Pediatric Blood &  
6 Cancer Biology Program, Stem Cell Center, Oregon Health & Science University, Portland,  
7 OR. <sup>2</sup>Committee on Immunology, Graduate Program in Biosciences, University of Chicago,  
8 Chicago, IL. <sup>3</sup>Department of Microscopic and Developmental Anatomy, Tokyo Women's  
9 Medical University, Tokyo. <sup>4</sup>Comprehensive Bone Marrow Failure Center, Children's Hospital  
10 of Philadelphia; Perelman School of Medicine, University of Pennsylvania, Philadelphia, PA.

11

12 **Text Word Count** (Excluding Title page, Abstract, Figure legends and References): 2,947

13

14 **Abstract word count:** 111

15

16 **References:** 38

17

18 **Figures:** 3 (Supplemental Figures: 2)

19

20 **Running Title:** FANCD2 counters replication stress in FL HSC

21

22 **Communicating Author:** Peter Kurre, MD; University of Pennsylvania, Perelman School of  
23 Medicine; Children's Hospital of Philadelphia; Abramson Research Center, ARC302, 3615  
24 Civic Center Drive, Philadelphia, PA 19104 kurrep@email.chop.edu

25

26

27 **ABSTRACT**

28 Bone marrow failure (BMF) in Fanconi Anemia (FA) results from exhaustion of  
29 hematopoietic stem cells (HSC), but the physiological role of FA proteins in HSC pool  
30 integrity remains unknown. Herein we demonstrate that FANCD2, a core component of the  
31 FA pathway, counters replication stress during developmental HSC expansion in the fetal  
32 liver (FL). Rapid rates of proliferation and FANCD2 deficient result in excess RPA-coated  
33 ssDNA, and provoke pChk1 activation and *Cdkn1a(p21)* nuclear localization in fetal *Fancd2*<sup>-/-</sup>  
34 HSC. Checkpoint mediated S-phase delays induced by *Cdkn1a(p21)* are rescued by Tgf-  
35  $\beta$  inhibition, but pChk1 activation is further aggravated. Our observations reveal the  
36 mechanism and physiological context by which FANCD2 safeguards HSC pool formation  
37 during development.

38

## 39 INTRODUCTION

40 Hematopoietic stem cells (HSC) are defined by their ability to self-renew and differentiate,  
41 whereby successive rounds of cell division give rise to increasingly specialized progenitor  
42 cells while maintaining a pool of multipotent HSC. To generate adequate regenerative  
43 capacity, fetal stem cells successively colonize different microenvironments, each providing  
44 unique cues for the formation of a finite pool of HSC clones that provide the basis for a  
45 lifelong supply of blood and immune cells (Mikkola and Orkin, 2006). The fetal liver (FL)  
46 takes on a crucial role for rapid clonal expansion during development. Not surprisingly, HSC  
47 rely on intact cell cycle checkpoints and DNA repair pathways to minimize the potential  
48 mutational burden in a highly proliferative HSC pool (Beerman et al., 2014; Schuler et al.,  
49 2019).

50 Fanconi Anemia (FA) is a cancer predisposition syndrome, and bone marrow (BM) failure  
51 early in life is a principal source of morbidity and mortality (Ceccaldi et al., 2012; Rosenberg  
52 et al., 2004). Compound heterozygous mutations in one of 22 FA genes that cooperate in a  
53 DNA repair pathway also lead to HSC deficits and symptomatic cytopenias by early school  
54 age. Indeed, even the youngest patients reveal depleted hematopoietic stem and progenitor  
55 cell (HSPC) populations (Ceccaldi et al., 2012; Kelly et al., 2007). Whereas murine models  
56 of FA mimic the *postnatal* p53-dependent, apoptotic HSC loss seen in patients only under  
57 experimental stress, we and others observed spontaneous deficits in the HSC pool of *Fancc*<sup>-</sup>  
58 <sup>-</sup>, *Fancd2*<sup>-</sup>, *Fancg*<sup>-</sup> fetuses (Botthof et al., 2017; Ceccaldi et al., 2012; Domenech et al.,  
59 2018; Kamimae-Lanning et al., 2013; Suzuki et al., 2016; Yoon et al., 2016). Neither the  
60 specific mechanism, nor physiologic stage of onset for hematopoietic failure in FA are  
61 currently known. Hematopoietic reserve in the adult is typically guarded by maintaining a  
62 majority of HSC in quiescence and successively activating individual clones to match  
63 demand. Accordingly, the formation of a sufficient pool of HSC to last a lifetime is tightly  
64 regulated, and any deficits in generating sufficient clonal diversity *in utero* will exert a  
65 disproportionate influence on the pace of postnatal hematopoiesis exhaustion.

66 Previously, several groups showed that FANCD2 is upregulated in response to experimental  
67 replication stress conditions (Balcerek et al., 2018; Chaudhury et al., 2013; Lossaint et al.,  
68 2013; Schlacher et al., 2011; Schlacher et al., 2012; Thompson et al., 2017; Tian et al.,

69 2017). Here we show that this matches the physiological role in the FL without experimental  
70 provocation, making FANCD2 a critical component for HSC pool formation during  
71 development.

72

73

## 74 **RESULTS**

### 75 **The fetal liver specifies a developmental window of vulnerability that governs**

#### 76 **FANCD2<sup>-/-</sup> HSC losses**

77 Steady state function and regenerative capacity of the hematopoietic system rely on a finite  
78 number of HSC, formed during development and sufficient to assure lifelong function  
79 (Mikkola and Orkin, 2006). To understand the origin of developmental deficits in FA, we first

80 performed detailed profiling of HSPC subsets in WT and *Fancd2*<sup>-/-</sup> mice at seven time  
81 points across ontogeny, in FL (E12.5, E13.5, E14.5 and E18.5), fetal BM at E18.5, postnatal

82 BM at P21 and adult BM at 10- and 30-weeks. Results reveal near equivalent HSC (Lin<sup>-</sup>  
83 /Sca-1<sup>+</sup>/c-kit<sup>+</sup>/CD150<sup>+</sup>/CD48<sup>-</sup>) frequency at E12.5, with significant differences between the  
84 two genotypes first emerging during the ensuing expansion in the FL (**Fig. 1A**). The data

85 are consistent with studies in *Fanca*<sup>-/-</sup> mice (Kaschutnig et al., 2015), where differences in  
86 BM HSC frequency normalize rapidly postnatally and become non-significant after the P21  
87 time point, when HSC assume a more quiescent adult phenotype (Copley et al., 2013).

88 Analysis of myeloid-committed multipotent progenitors (MPP) 2 (Lin<sup>-</sup>/Sca-1<sup>+</sup>/c-  
89 kit<sup>+</sup>/CD150<sup>+</sup>/CD48<sup>+</sup>) (**Fig. S1A**) and the lymphoid progenitors enriched MPP3/4 population  
90 (Lin<sup>-</sup>/Sca-1<sup>+</sup>/c-kit<sup>+</sup>/CD150<sup>-</sup>/CD48<sup>+</sup>) (**Fig. S1B**) indicate that *Fancd2*<sup>-/-</sup> deficits give way to  
91 a myeloid predominant hematopoietic system, a known response to proliferative stress in  
92 the aging hematopoietic system (Pietras et al., 2015).

93 A focused analysis of absolute FL HSC and HSPC (Lin<sup>-</sup>/Sca-1<sup>+</sup>/c-Kit<sup>+</sup>) (**Fig. 1B**) shows the  
94 predicted rapid gains in absolute number for WT and the lag for *Fancd2*<sup>-/-</sup> KO cells during  
95 the critical HSC expansion phase from E12.5 – E14.5.

96 We reasoned that in spite of numerical HSC equivalency between genotypes at E12.5 and  
97 in the adult BM, experimental proliferative stress should reveal the same functional deficits  
98 in *Fancd2*<sup>-/-</sup> seen at E13.5 and 14.5 in the fetal liver. Results in E12.5 and adult BM at 9 wk  
99 showed that significant clonogenic deficits emerge among colony forming cells, including  
100 the most primitive *Fancd2*<sup>-/-</sup> subset (CFU-GEMM) (**Fig. S1C**). To assess *in vivo*  
101 repopulation capacity, we performed serial transplants of E12.5 *Fancd2*<sup>-/-</sup> FL cells that  
102 confirmed deficits following the replicative stress of repopulation, which occurs with  
103 increasing p53 phosphorylation of HSC (**Fig. S1DE**). Intriguingly, with secondary  
104 transplantation, *Fancd2*<sup>-/-</sup> cells showed low chimerism and revealed a peripheral blood  
105 myeloid (Mac1, Gr-1) bias, that phenocopies the behavior at steady state of myeloid  
106 progenitors (Fig. S1F).

107 These experiments suggest and confirm that FA HSC at E12.5 are vulnerable, but the  
108 physiologic functional deficits in FA HSC only emerge after E12.5, in response to  
109 proliferative cues in the FL.

110

111

### 112 **Fancd2 deletion causes S-phase entering delay in FL HSC**

113 A range of cell cycle abnormalities has been described in FA, with prominent loss of  
114 quiescence and adult HSC exhaustion (Brosh Jr et al., 2017; Nalepa and Clapp, 2018)  
115 judged by Ki-67 staining for G<sub>0</sub>/G<sub>1</sub>. With roughly 90% of fetal HSC typically in cycle in the  
116 WT FL before transition to a more quiescent phenotype postnatally (Copley et al., 2013), we  
117 observed that fetal FA FL HSC are in fact hypoproliferative and fail to adequately expand,  
118 even as they positively stain for Ki67 (Domenech et al., 2018; Yoon et al., 2016). To resolve  
119 the conflicting observations, we undertook detailed studies using a timed 5-ethyl-2'-  
120 deoxyuridine/Bromodeoxyuridine (EdU/BrdU) sequential injection into pregnant E13.5 dams  
121 (Akinduro et al., 2018). Conceptually, cells entering S- phase during the two hours following  
122 EdU injection will initially become EdU<sup>+</sup>. This is followed by BrdU injection, when cells newly  
123 entering S-phase become EdU<sup>-</sup>/ BrdU<sup>+</sup>, cells exiting S-phase become EdU<sup>+</sup>/ BrdU<sup>-</sup>, and  
124 those that continue to remain in S-phase stain double positive EdU<sup>+</sup>/ BrdU<sup>+</sup> (**Fig. 1C**). Our

125 results show FL HSC enter S-phase more frequently than BM HSC, and a significantly  
126 greater fraction of *Fancd2*<sup>-/-</sup> FL HSC and HSPC stain EdU<sup>+</sup> and/or BrdU<sup>+</sup> compared to  
127 WT (**Fig. 1D**), indicating an increased population of cells containing newly replicating single  
128 strand DNA (ssDNA). This is consistent with an increase in ssDNA observed by alkaline  
129 comet assay we previously reported (Yoon et al., 2016). Concurrently, the frequency of EdU-  
130 /BrdU<sup>+</sup> HSC and Lin<sup>-</sup> cells was decreased in *Fancd2*<sup>-/-</sup> compared to WT (**Fig. 2E**), indicative  
131 of delayed S-phase entry. These results confirm *Fancd2*<sup>-/-</sup> FL HSC as less quiescent, but  
132 demonstrate a failure to progress through S-phase.

133

134

### 135 **Replication stress is increased in the *Fancd2* deficient FL HSC**

136 FANCD2 specifically cooperates in sensing and resolving replication stress following  
137 experimental induction with hydroxyurea, aphidicoline and other agents. We hypothesized  
138 that the physiologic role of FANCD2 *in vivo* is to counter replication stress to rapid rates of  
139 proliferation in the fetal HSC pool. To determine whether *Fancd2*<sup>-/-</sup> HSC experience  
140 replication stress, we checked replication associated protein (RPA)32; known to rapidly  
141 stabilize nuclear ssDNA during stalled replication. Our data in *Fancd2*<sup>-/-</sup> HSPC showed  
142 increased phosphorylation of RPA32 with unchanged RPA70 protein levels (**Fig. 2A and**  
143 **S2A**). Phosphorylation of RPA-ATR is typically followed by phosphorylation of Chk1 (pChk1),  
144 which we found to be significantly increased as well (**Fig. 2B**). We reasoned that slower  
145 division cycles in adult phenotype (9 weeks) and pre-expansion E12.5 FL HSPC would fail  
146 to increase pChk1, and we found no significant differences between WT and *Fancd2*<sup>-/-</sup> (**Fig.**  
147 **2CD**). These results reflect the unique replication stress conditions during FL HSC  
148 expansion and the vulnerability of FA cells at this stage.

149 Deficits in mini chromosome maintenance (MCM) proteins are associated with replication  
150 stress and cell cycle defects in aging HSC (Flach et al., 2014). When we investigated activity  
151 in FA phenotype FL cells, we observed significantly increased phosphorylation of MCM2, a  
152 marker of replication fork stalling, at both S53 and S108 sites in *Fancd2*<sup>-/-</sup> fetal HSPC (**Fig.**  
153 **2EF**). Unlike the situation in aging HSC, we observed no evidence of broad transcriptional

154 dysregulation when we conducted a gene expression survey of the additional DNA  
155 replication licensing factors MCM 2-7, Cdc1-7 kinases, and its activation co-factor Dbf4. Only  
156 Cdc7 was transcriptionally increased; however, there was no change at the protein level  
157 **(Fig S2BC)**.

158 Transcriptional activity of CDKN1A(p21) in FA HSPC is typically considered a consequence  
159 of p53 pathway activation. On the other hand, p21 nuclear localization is a p53-independent  
160 event and associated with replication fork stalling (Karimian et al., 2016; Pietras et al., 2011;  
161 Li et al., 1996; Ma et al., 2013). Results from our studies of FL HSPC demonstrate a  
162 significant increase in nuclear CDKN1A(p21) in *Fancd2*<sup>-/-</sup> compared with WT **(Fig. 2G)**.  
163 Moreover, we considered the potential increase in RNA/DNA hybrids (termed R-loops),  
164 increased under experimentally induced replication stress. Unexpectedly, R-loop foci in  
165 *Fancd2*<sup>-/-</sup> KSL cells were decreased compared to WT **(Fig. S2D)**. Altogether, the data further  
166 show that *Fancd2*<sup>-/-</sup> HSC experience exacerbated replication stress in the FL.

167 Cells completing replication under stress conditions can convert ssDNA breaks to dsDNA  
168 breaks, and other investigators have found low levels of  $\gamma$ -H2AX lesions without  
169 experimental induction. However, we examined fetal *Fancd2*<sup>-/-</sup> HSPC and observed no  
170 spontaneous increase in  $\gamma$ -H2AX intensity, consistent with an absence of apoptosis markers  
171 and a lower rate of cell cycle completion **(Fig. S3F; Yoon et al., 2016; Suzuki et al., 2016;**  
172 **Domenech et al., 2018)**. The aggregate data suggest that replication stress is a plausible  
173 cause for the observed delays in S-phase progression and deficits in FA FL HSPC  
174 expansion.

175

176

### 177 **TGF- $\beta$ inhibition rescues CDKN1A (p21) activation and *Fancd2*<sup>-/-</sup> FL progenitor** 178 **formation but not pChk1 activation**

179 To address how CDKN1A(p21) activity is regulated in fetal *Fancd2*<sup>-/-</sup> HSC, we considered  
180 TGF- $\beta$  signaling, a potent p53-independent activator of Cdkn1a(p21) in proliferating cells  
181 (Datto et al., 1995), and recently shown to be constitutively active in adult *Fancd2*<sup>-/-</sup> HSC

182 (Ceccaldi et al., 2012; Karimian et al., 2016). First, we measured TGF- $\beta$  receptor 1  
183 (Tgfb1) expression and found it to be increased in *Fancd2*<sup>-/-</sup> HSC (**Fig. 3A**). Intriguingly,  
184 we show that pharmacological inhibition of TGF- $\beta$  by SD208 reverses the nuclear  
185 localization of Cdkn1a(p21) (**Fig. 3B**) and rescues the clonogenicity of primitive CFU-  
186 GEMM myeloid progenitors (**Fig. 3C**). However, in agreement with the notion of differential  
187 regulation for S-phase entry *versus* cell cycle progression (Rodriguez and Meuth, 2006),  
188 SD208, did not reverse pChk1 activation (**Fig. 3D**). These observations may suggest that  
189 the coincident increase observed in pChk1 after inhibition of TGF- $\beta$  represents as an  
190 aggravated replication stress response following release from Cdkn1a(p21) cell cycle  
191 inhibition.

192  
193

## 194 **DISCUSSION**

195 Experimental manipulation in murine models of FA provides strong evidence that multiple,  
196 non-mutually exclusive mechanisms contribute to the p53-dependent pro-apoptotic  
197 phenotype of adult FA HSPC that underlies the rapidly progressive decline in postnatal  
198 hematopoietic function in FA patients. We and others have previously reported the  
199 unexpected spontaneous deficits in the fetal HSPC pool of FA mice, and in this study, we  
200 identify a physiologic role for FANCD2 in an experimentally unprovoked *in vivo* system;  
201 namely, FANCD2 counters replication stress during rapid expansion in the fetal liver to attain  
202 proper HSC pool size and sustain lifelong hematopoietic needs (**Fig. 3E**). Such a role is  
203 consistent with HSC exhaustion that follows proliferative stress after experimental poly-I:C  
204 injection or serial transplantation to in FA deficient animals (Walter et al., 2015) and validates  
205 *in vitro* studies of the role FA proteins play in the replication stress response (Schlacher et  
206 al., 2011; Schlacher et al., 2012; Thompson et al., 2017).

207

208 The lack of fetal expansion was not explained by apoptosis, as seen in adult FA HSC.  
209 Moreover, such a hypoproliferative phenotype was difficult to reconcile with Ki67 cell cycle  
210 staining and we opted for greater cell cycle phase resolution using sequential EdU/ BrdU  
211 injections. These studies indeed confirmed that delays in S-phase entry and progression



212 prevent fetal HSC pool expansion in *Fancd2*<sup>-/-</sup>. This offers a plausible explanation for the  
213 fetal FA HSC phenotype, given most HSPC are in cycle, than the mere loss of quiescence  
214 that explains exhaustion in adult FA deficient HSC (Copley et al., 2013).

215

216 Mechanistically, FANCD2 serves as a histone chaperone and may regulate accessibility of  
217 both replication- and transcription complex proteins to DNA (Sato et al., 2012). As a result,  
218 FANCD2 effectively suppresses the recruitment of additional replication origins during  
219 experimentally induced replication stress (Chaudhury et al., 2013; Thompson et al., 2017),  
220 consistent with our observed increase in replicated ssDNA and newly synthesized RNA (Fig.

221 1D, data not shown). Phosphorylation of MCM2 at both S53 and S108 sites in *Fancd2*<sup>-/-</sup> FL  
222 HSC further confirm that FA proteins also counter replication fork stalling *in vivo*.

223

224 Phosphorylation of RPA and Chk1 are canonical events during the replication stress  
225 response, and are significantly increased in fetal FA HSC during expansion in the liver (Fig.  
226 2; Zeman and Cimprich, 2014). Importantly, pChk1 activation is not seen in E12.5 and adult  
227 BM HSPCs, indicating unique proliferative pressure in the FL during HSC expansion, and  
228 provides the physiological context for replication stress whereby Cdkn1a(p21) activity at the  
229 S-phase transition effectively restrains HSC proliferation during a critical developmental  
230 window. Such a p53-independent function of Cdkn1a(p21) in limiting proliferation in the FA  
231 HSC pool is also supported by studies of human fibroblasts under experimental replication  
232 stress (Lossaint et al., 2013). In adult FA HSC, the increased expression of Cdkn1a(p21) is  
233 widely considered a consequence of p53 engagement (Ceccaldi et al., 2012; Zhang et al.,  
234 2016). However, the concurrent loss of FANCD2 and p53 function in mice conferred only  
235 partial HSC rescue, whereas the compound loss of Cdkn1a(p21) and FANCD2 (but intact  
236 p53) further aggravates FA HSC losses (Ceccaldi et al., 2012; Garaycochea et al., 2018;  
237 Zhang et al., 2013). Along with our data, these observations support the existence of a model  
238 whereby there is a p53-independent mechanism of developmental HSC failure in FA that  
239 invokes such a role for Cdkn1a(p21).

240 We show *in vivo* differences in pChk1 and Cdkn1a(p21) between WT and *Fancd2*<sup>-/-</sup> HSPC,  
241 that are not present in *in vitro* assays (Fig. **3B,D**), and attribute this to differences in

242 metabolism and cell cycle progression, as has been noted in previous studies (Beerman et  
243 al, 2014).

244 TGF- $\beta$  is known to rescue clonogenicity and HSC deficits in adult FA BM cells by altering  
245 DNA repair pathway usage (Zhang, H et al, 2016). Our experiments show for the first time  
246 that SD208 (Tgf-  $\beta$  receptor1 inhibitor) treatment can also restore fetal FA multipotent colony  
247 formation and nuclear Cdkn1a(p21) localization. However, this does not resolve the  
248 underlying replication stress and actually aggravates pChk1 expression in *Fancd2*<sup>-/-</sup> HSPC  
249 (Fig. 3). This may be relevant for the critical role Chk1 plays in maintaining self-renewal,  
250 safeguarding HSC pool integrity, and minimizing mutational burden (Schuler et al., 2019).  
251 As an important clinical corollary, the attenuated phosphorylation of Chk1, i.e. low CHK1  
252 expression, seen in some adult FA patients leads to temporary improvement in  
253 hematopoietic function, that subsequently gives way to myelodysplastic clonal evolution  
254 (Ceccaldi et al., 2011). Thus, available evidence indicates that both Cdkn1a(p21) and pChk1  
255 prevent apoptosis in fetal *Fancd2*<sup>-/-</sup> HSPC. How they spatially and temporally interact in  
256 regulating cell cycle progression remains to be clarified.

257 In aggregate, our study reveals the origin and a physiologic mechanism for fetal  
258 hematopoietic failure in FANCD2 deficient animals, which may hold new therapeutic  
259 opportunity for the rescue of hematopoietic function in FA patients and offer insight for other  
260 BMF disorders.

261

262 **REFERENCES**

- 263 **Botthof, J., Bielczyk-Maczy ska, E., Ferreira, L. and Cvejic, A.** (2017). Loss of the  
264 homologous recombination gene rad51 leads to Fanconi anemia-like symptoms in  
265 zebrafish. *Proc National Acad Sci* **114**, E4452–E4461.
- 266 **Brosh Jr, R. M., Bellani, M., Liu, Y. and idman, M.** (2017). Fanconi Anemia: A DNA  
267 repair disorder characterized by accelerated decline of the hematopoietic stem cell  
268 compartment and other features of aging. *Ageing Res Rev* **33**, 67-75.
- 269 **Ceccaldi, R., Briot, D., Larghero, J., Vasquez, N., d’Enghien, C., Chamousset, D.,**  
270 **Noguera, M.-E., Waisfisz, Q., Hermine, O., Pondarre, C., et al.** (2011). Spontaneous  
271 abrogation of the G2 DNA damage checkpoint has clinical benefits but promotes  
272 leukemogenesis in Fanconi anemia patients. *J Clin Invest* **121**, 184–194.
- 273 **Ceccaldi, R., Parmar, K., Mouly, E., Delord, M., Kim, J., Regairaz, M., Pla, M.,**  
274 **Vasquez, N., Zhang, Q.-S., Pondarre, C., et al.** (2012). Bone marrow failure in Fanconi  
275 anemia is triggered by an exacerbated p53/p21 DNA damage response that impairs  
276 hematopoietic stem and progenitor cells. *Cell Stem Cell* **11**, 36-49.
- 277 **Chaudhury, I., Sareen, A., Raghunandan, M. and Sobeck, A.** (2013). FANCD2  
278 regulates BLM complex functions independently of FANCI to promote replication fork  
279 recovery. *Nucleic Acids Res* **41**, 6444–6459.
- 280 **Copley, M. R., Babovic, S., Benz, C., Knapp, D. J., Beer, P. A., Kent, D. G., Wohrer, S.,**  
281 **Treloar, D. Q., Day, C., Rowe, K., et al.** (2013). The Lin28b-let-7-Hmga2 axis determines  
282 the higher self-renewal potential of fetal haematopoietic stem cells. *Nat Cell Biol* **15**, 916-  
283 925.
- 284 **Datto, M., Li, Y., Panus, J., Howe, D., Xiong, Y. and Wang, X.** (1995). Transforming  
285 growth factor beta induces the cyclin-dependent kinase inhibitor p21 through a p53-  
286 independent mechanism. *Proceedings of the National Academy of Sciences* **92**, 5545-  
287 5549.

- 288 **Domenech, C., Maillard, L., Rousseau, A., Guidez, F., Petit, L., Pla, M., Clay, D.,**  
289 **Guimiot, F., Sanfilippo, S., Jacques, S., et al.** (2018). Studies in an Early Development  
290 Window Unveils a Severe HSC Defect in both Murine and Human Fanconi Anemia. *Stem*  
291 *Cell Rep* **11**, 1075-1091.
- 292 **Flach, J., Bakker, S. T., Mohrin, M., Conroy P. C., Pietras, E. M., Reynaud, D.,**  
293 **Alvarez, S., Diolaiti, M. E., Ugarte, F., Forsberg, E C., Beau, M. M L., Stohr B. A.,**  
294 **Mendez, J., Morrison C.G., Passegue, E.** (2014). Replication stress is a potent driver of  
295 functional decline in ageing haematopoietic stem cells. *Nature* **512**, 198-202.
- 296 **Garaycochea, J. I., Crossan, G. P., Langevin, F., Mulderrig, L., Louzada, S., Yang,**  
297 **F., Guilbaud, G., Park, N., Roerink, S., Nik-Zainal, S., et al.** (2018). Alcohol and  
298 endogenous aldehydes damage chromosomes and mutate stem cells. *Nature* **553**, 171–  
299 177.
- 300 **Houghtaling, S., Timmers, C., Noll, M., Finegold, M. J., Jones, S. N., Meyn, S. M. and**  
301 **Grompe, M.** (2003). Epithelial cancer in Fanconi anemia complementation group D2  
302 (Fancd2) knockout mice. *Gene Dev* **17**, 2021–2035.
- 303 **Howlett, N. G., Taniguchi, T., Durkin, S. G., D’Andrea, A. D. and Glover, T. W.** (2005).  
304 The Fanconi anemia pathway is required for the DNA replication stress response and for  
305 the regulation of common fragile site stability. *Hum Mol Genet* **14**, 693–701.
- 306 **Kamimae-Lanning, A. N., Goloviznina, N. A. and Kurre, P.** (2013). Fetal origins of  
307 hematopoietic failure in a murine model of Fanconi anemia. *Blood* **121**, 2008-2012.
- 308 **Karimian, A., Ahmadi, Y. and Yousefi, B.** (2016). Multiple functions of p21 in cell cycle,  
309 apoptosis and transcriptional regulation after DNA damage. *Dna Repair* **42**, 63-71.
- 310 **Kaschutnig, P., Bogeska, R., Walter, D., Lier, A., Huntscha, S. and Milsom, M. D.**  
311 (2015). The Fanconi anemia pathway is required for efficient repair of stress-induced DNA  
312 damage in haematopoietic stem cells. *Cell Cycle* **14**, 2734–2742.

- 313 **Kelly, P. F., Radtke, S., von Kalle, C., Balcik, B., Bohn, K., Mueller, R., Schuesler, T.,**  
314 **Haren, M., Reeves, L., Cancelas, J. A., et al.** (2007). Stem Cell Collection and Gene  
315 Transfer in Fanconi Anemia. *Mol Ther* **15**, 211–219.
- 316 **Li, R., Hannon, G. J., Beach, D. and Stillman, B.** (1996). Subcellular distribution of p21  
317 and PCNA in normal and repair-deficient cells following DNA damage. *Curr Biol* **6**, 189-  
318 199.
- 319 **Lossaint, G., Larroque, M., Ribeyre, C., Bec, N., Larroque, C., Décaillet, C., Gari, K.**  
320 **and Constantinou, A.** (2013). FANCD2 binds MCM proteins and controls replisome  
321 function upon activation of s phase checkpoint signaling. *Mol Cell* **51**, 678-690.
- 322 **Ma, W., Westmoreland, J. W. and Resnick, M. A.** (2013). Homologous recombination  
323 rescues ssDNA gaps generated by nucleotide excision repair and reduced translesion  
324 DNA synthesis in yeast G2 cells. *Proc National Acad Sci* **110**, E2895–E2904.
- 325 **Mikkola, H. K. and Orkin, S. H.** (2006). The journey of developing hematopoietic stem  
326 cells. *Development* **133**, 3733–3744.
- 327 **Nalepa, G. and Clapp, W. D.** (2018). Fanconi anaemia and cancer: an intricate  
328 relationship. *Nat Rev Cancer* **18**, 168-185.
- 329 **Pietras, E. M., Warr, M. R. and Passegué, E.** (2011). Cell cycle regulation in  
330 hematopoietic stem cells. *J Cell Biology* **195**, 709-720.
- 331 **Pietras, E. M., Reynaud, D., Kang, Y.-A., Carlin, D., Calero-Nieto, F. J., Leavitt, A. D.,**  
332 **uart, J., Göttgens, B. and Passegué, E.** (2015). Functionally Distinct Subsets of Lineage-  
333 Biased Multipotent Progenitors Control Blood Production in Normal and Regenerative  
334 Conditions. *Cell Stem Cell* **17**, 35-46.
- 335 **Rodriguez, R. and Meuth, M.** (2006). Chk1 and p21 Cooperate to Prevent Apoptosis  
336 during DNA Replication Fork Stress. *Mol Biol Cell* **17**, 402–412.

- 337 **Rosenberg, P. S., Huang, Y. and Alter, B. P.** (2004). Individualized risks of first adverse  
338 events in patients with Fanconi anemia. *Blood* **104**, 350–355.
- 339 **Sato, K., Ishiai, M., Toda, K., Furukoshi, S., Osakabe, A., Tachiwana, H., Takizawa, Y.,**  
340 **Kagawa, W., Kitao, H., Dohmae, N., Obuse, C., Kimura, H., Takata, M. and**  
341 **Kurumizaka, H.** (2012). Histone chaperone activity of Fanconi anemia proteins, FANCD2  
342 and FANCI, is required for DNA crosslink repair. *EMBO J.* **31**(17), 3524-2526
- 343
- 344 **Schlacher, K., Christ, N., Siaud, N., Egashira, A., Wu, H. and Jasin, M.** (2011).  
345 DoubleStrand Break Repair-Independent Role for BRCA2 in Blocking Stalled Replication  
346 Fork Degradation by MRE11. *Cell* **145**, 529-542.
- 347 **Schlacher, K., Wu, H. and Jasin, M.** (2012). A Distinct Replication Fork Protection  
348 Pathway Connects Fanconi Anemia Tumor Suppressors to RAD51-BRCA1/2. *Cancer Cell*  
349 **22**, 106-116.
- 350 **Schuler, F., Afreen, S., Manzi, C., Häcker, G., Erlacher, M. and Villunger, A.** (2019).  
351 Checkpoint kinase 1 is essential for fetal and adult hematopoiesis. *Embo Rep* e47026.
- 352 **Suzuki, S., Racine, R. R., Manalo, N. A., Cantor, S. B. and Raffel, G. D.** (2016).  
353 Impairment of fetal hematopoietic stem cell function in the absence of Fancd2. *Exp*  
354 *Hematol* **48**, 79-86.
- 355 **Thompson, E. L., Yeo, J. E., Lee, E.-A., Kan, Y., Raghunandan, M., Wiek, C.,**  
356 **Hanenberg, H., Schärer, O. D., Hendrickson, E. A. and Sobeck, A.** (2017). FANCI and  
357 FANCD2 have common as well as independent functions during the cellular replication  
358 stress response. *Nucleic Acids Res* **45**, 11837-11857.
- 359 **Tian, Y., Shen, X., Wang, R., Klages-Mundt, N. L., Lynn, E. J., Martin, S. K., Ye, Y.,**  
360 **Gao, M., Chen, J., Schlacher, K., et al.** (2017). Constitutive role of the Fanconi anemia  
361 D2 gene in the replication stress response. *J Biol Chem* **292**, 20184–20195.

- 362 **Yoon, Y., Storm, K. J., Kamimae-Lanning, A. N., Goloviznina, N. A. and Kurre, P.**  
363 (2016). Endogenous DNA Damage Leads to p53-Independent Deficits in Replicative  
364 Fitness in Fetal Murine *Fancd2*  $-/-$  Hematopoietic Stem and Progenitor Cells. *Stem Cell*  
365 *Rep* **7**, 840–853.
- 366 **Zeman, M. K. and Cimprich, K. A.** (2014). Causes and consequences of replication  
367 stress. *Nat Cell Biol* **16**, 29.
- 368 **Zhang, Q.-S., Watanabe-Smith, K., Schubert, K., Major, A., Sheehan, A. M., Marquez-**  
369 **Loza, L., Newell, A. E., Benedetti, E., Joseph, E., Olson, S., et al.** (2013). *Fancd2* and  
370 p21 function independently in maintaining the size of hematopoietic stem and progenitor  
371 cell pool in mice. *Stem Cell Res* **11**, 687–692.
- 372 **Zhang, H., Kozono, D. E., O'Connor, K. W., Vidal-Cardenas, S., Rousseau, A.,**  
373 **Hamilton, A., Moreau, L., Gaudio, E. F., Greenberger, J., Bagby, G., et al.** (2016).  
374 TGF- Inhibition Rescues Hematopoietic Stem Cell Defects and Bone Marrow Failure in  
375 Fanconi Anemia. *Cell Stem Cell* **18**, 668-681.  
376  
377

## 378 **MATERIALS AND METHODS**

379

### 380 **Animal husbandry and cells**

381 C57/BL6 background *Fancd2* KO mice (Houghtaling et al., 2003) were bred and used for  
382 experiments. WT and *Fancd2* KO fetuses were harvested from timed pregnancies  
383 generated from crossing heterozygous female mice with heterozygous male mice WT and  
384 *Fancd2* KO fetuses were harvested from timed pregnancies generated from crossing  
385 heterozygous female mice with heterozygous male mice. Fetal livers were harvested from  
386 pups and separated by mechanical disruption, filtration and subsequent red blood lysis to  
387 get mononuclear cells. Bone marrow was harvested from femur.

388 Animal husbandry, tissue harvest and processing were all described previously (Yoon et al.,  
389 2016). All animal experiments were approved by the OHSU and CHOP Animal Care and  
390 Use Committee.

391

### 392 **Immunophenotyping and FACS analysis**

393 FL or BM mononuclear cells were stained with Lineage marker antibodies (CD3e, CD4, CD5,  
394 B220, Gr-1, Ter119) as well as HSPC markers: c-Kit, Sca-1, CD48 and CD150 for 30mins  
395 at 4 degree. Blocking and washing Buffer contained 2%FBS/ PBS. Dead cell exclusion  
396 staining used DAPI at 1ug/ml. Flow cytometric analysis was performed using FACS Canto2  
397 and LSR2 instruments (Becton-Dickinson) as described (Yoon et al., 2016). Reagent  
398 Supplemental Table 1 for details.

399

### 400 **Colony Formation Unit (CFU) assay**

401 Harvested and RBC lysed FL and BM were counted using Trypan blue stains and mixed  
402 with cytokine supplemented commercial mouse methylcellulose media (R&D Systems,  
403 HSC007), with aliquots divided into 3 x 3.5cm dishes, cultured at 37 degree. After 10-14  
404 days, colony number and colony subtype were scored under an inverted light microscope.

405

### 406 **Serial Transplantation**

407 Harvested and RBC-lysed E12.5 FL ( $5 \times 10^5$ ) were injected via the tail vein in CD45.1  
408 recipients that received 750cGy using a  $\gamma$  irradiator (single dose). At 20 weeks from



409 transplantation, animals were sacrificed, tissues analyzed and secondary transplantation  
410 was performed with injection of  $1 \times 10^6$  BM cells into 750Gy irradiated CD45.1 recipients.  
411 Peripheral blood from both primary and secondary recipients was analyzed for chimerism at  
412 9 weeks from transplantation, using antibodies against Gr-1, Mac-1, B220, CD3e and DAPI,  
413 by FACS using a Canto2 (BectonDickinson).

414

415 **EdU/ BrdU cell cycle assay**We modified a previously reported assay (**Akinduro et al.,**  
416 **2018**) with sequential injection via the tail vein of E13.5 pregnant females (vaginal plug  
417 method) with 1mg of EdU, followed 2 hours later by 2mg of BrdU. After 30 minutes FLs were  
418 harvested and individually processed. Isolated FL mononuclear cells were stained with  
419 surface markers (CD150, CD48, c-Kit, Sca-1, Lin) and fixed in 2% paraformaldehyde (PFA)  
420 for 15 minutes, followed by permeabilization with 0.5% saponin and stained with anti-EdU-  
421 AF488. To stain with anti-BrdU antibody, we treated with 20ug of DNase in PBS (containing  
422  $\text{Ca}^{++}$ ,  $\text{Mg}^{++}$ ) at 37 degree for 40 minutes before staining with BrdU-AF647 (B35140, Thermo).  
423 Analysis was performed with FACS LSR2 (Becton-Dickinson).

424

#### 425 **Analytical flow cytometry**

426 FL or BM mononuclear cells were stained with surface markers and fixed with 2% PFA for  
427 15 minutes, permeabilized with 0.5% saponin and stained anti-p53, anti-p53S15 and anti-  
428 Cdc7. Analysis was performed with FACS LSR2 (Becton-Dickinson) and data processed  
429 with Flowjo 10.5.0 to quantify mean fluorescent intensity (MFI). Supplemental Table 1 for  
430 Reagent details.

431

#### 432 **Flow cytometric sorting**

433 FL mononuclear cells were stained with CD150, CD48, c-Kit, Sca-1, Lin and DAPI (Thermo  
434 62248, 1ug/ml) and sorted using an Influx Aria Fusion instrument (Becton-Dickinson).

435

#### 436 **Immunofluorescence**

437 Sorted cells ( $5-500 \times 10^3$ ) were placed on glass slides using a cytocentrifuge, followed by  
438 incubation with or without Cytoskeletal (CSK) buffer for 10min, at room temperature and

439 fixed in 4% PFA. Permeabilization was performed by 0.5% Triton and blocking was with 3%  
440 BSA/PBS at 37 degree for 30 minutes. Primary antibody staining was performed on parafilm  
441 at 37 degree for 30 mins, and secondary antibodies were used with 1:1000 dilution at 37  
442 degree for 30min. For nuclear staining, DAPI was used at room temperature for 10min. For  
443 coverslip mounting we used Fluoromount-G (0100, Southern Biotech). Images were  
444 captured on a Core DV microscope (Olympus) and via LSR700 confocal microscopy (Carl  
445 Zeiss). Images were processed and analyzed with Imaris software (Bitplane). Supplemental  
446 Table 1 for Reagent details.

447

#### 448 **Quantitative RT-PCR analysis**

449 RNA from flow cytometrically sorted cells was isolated using the RNeasy mini and micro kit  
450 (QIAGEN). Reverse transcription was performed using SuperScript™ Master Mix  
451 (Invitrogen). For Q-PCR, we used FastStart Essential DNA Green Master (Roche) and  
452 LightCycler 96<sup>®</sup> (Roche).

453

#### 454 **Ex vivo cell culture**

455 SLAM marker -sorted cells were placed in StemSpan (09650, Stem Cell Tech.)  
456 supplemented with 0.5% Penicillin/streptomycin, stem cell factor (250-03, Peprotech)  
457 50ng/ml and thrombopoietin (315-14, Peprotech) at 50ng/ml.

458

#### 459 **Quantification and Statistical Analysis**

460 All numerical results were expressed as mean  $\pm$  SD. Two- tailed Student's t tests, Welch  
461 test and One-way ANOVA were performed for statistical analyses. All analyses were  
462 performed with GraphPad PRISM 7.0

463

464

#### 465 **ACKNOWLEDGEMENTS**

466 We are grateful for support by the Department of Pediatrics at OHSU and wish to thank Dr.  
467 Devo Goldman, Dr. Sherif Abdelhamed, John T. Butler and Dr. Qingshuo Zhang for support  
468 and guidance with select experiments. We acknowledge Yanet Wossenseged for her  
469 contributions to Figure 3E.

470 **Figure legends**

471 **Figure 1** S-phase delay in *Fancd2*<sup>-/-</sup> FL HSC.

472 **(A,B)** Immunophenotyping was performed to determine the frequency of **(A)** CD150<sup>+</sup> CD48<sup>-</sup>  
473 Lin<sup>-</sup> Sca-1<sup>+</sup> c-Kit<sup>+</sup> (LSK), HSC in WT and *Fancd2*<sup>-/-</sup> cell across select time points in ontogeny.

474 **(B)** Absolute number of HSC (left panel) and LSK (right panel) in E12.5-13.5-14.5 of WT  
475 compared with *Fancd2*<sup>-/-</sup> FL. **A,B:** E12.5 n=3<sup>+/+</sup>, 7<sup>-/-</sup>, E13.5 n=4<sup>+/+</sup>, 5<sup>-/-</sup>, E14.5 n=9<sup>+/+</sup>, 6<sup>-/-</sup>, E18.5  
476 n=7<sup>+/+</sup>, 3<sup>-/-</sup>, P21 n=5<sup>+/+</sup>, 6<sup>-/-</sup>, 10 Weeks(10W) n=4<sup>+/+</sup>, 4<sup>-/-</sup>, 30W n=3<sup>+/+</sup>, 3<sup>-/-</sup>. \**P*<0.05, \*\**P*<0.01,  
477 \*\*\**P*<0.001, \*\*\*\**P*<0.0001.

478 **(C)** To understand midgestational deficits in HSC expansion, we performed kinetic cell  
479 cycles studies adapting a sequential EdU/BrdU injection protocol. Schema for sequential  
480 EdU/BrdU injection in the dam at E13.5 with cell cycle analysis. Representative flow panels  
481 illustrate FL (left) and BM (right) HSC distribution with predicted differences in dormancy,  
482 lower left quadrant. **(D)** Frequency of ssDNA containing cell (EdU<sup>+</sup> and/or BrdU<sup>+</sup>) in the  
483 indicated HSPC subsets. **(E)** Frequency of S-phase progression (BrdU<sup>+</sup>EdU<sup>-</sup> as a fraction of  
484 EdU<sup>+</sup> and/or BrdU<sup>+</sup>) in different HSPC populations (WT n=4, *Fancd2*<sup>-/-</sup> n=5) ; \**P*<0.05.

485

486 **Figure 2** Replication stress response was detected in *Fancd2*<sup>-/-</sup> FL HSPC.

487 **(A-E)** Immunofluorescence (IF) of **(A)** pRPA32 S4/S8 (WT: n=5 pups, 116 cells, *Fancd2*<sup>-/-</sup>:  
488 n=4 pups, 111 cells), **(B)** pChk1 S345 (WT: n=9 pups, 175 cells, *Fancd2*<sup>-/-</sup>: n=4 pups, 146  
489 cells), **(C)** pMCM S53 (WT: n=7 pups, 140 cells, *Fancd2*<sup>-/-</sup>: n=5 pups, 197 cells), **(D)** pMCM  
490 S108 (WT: n=4 pups, 64 cells, *Fancd2*<sup>-/-</sup>: n=6 pups, 149 cells), **(E)** Cdkn1a(p21) (WT n=4  
491 pups, 84 cells, *Fancd2*<sup>-/-</sup>; n=4 pups, 120 cells). All data are measured mean fluorescent  
492 intensity (MFI) of nuclear in E13.5 FL WT and *Fancd2*<sup>-/-</sup> HSPC. **(F, G)** IF of nuclear localized  
493 pChk1 S345 in **(F)** E12.5 HSC (WT n=2 pups, 63 cells, *Fancd2*<sup>-/-</sup>; n=5 pups, 81 cells) and  
494 **(G)** 8 weeks adult BM HSPC (used relative expression, WT n=2 pups, 106 cells, *Fancd2*<sup>-/-</sup>;  
495 n=2 pups, 113 cells). ; \**P*<0.05, \*\**P*<0.01, \*\*\**P*<0.001\*\*\*\**P*<0.0001.

496

497 **Figure 3** Tgf-β inhibition alters Cdkn1a(p21) localization, clonogenicity and pChk1 activity.

498 **(A)** Evaluate Protein Tgfbr1 volume in HSC, MPP234, Lin<sup>-</sup> and Total WT and *Fancd2*<sup>-/-</sup> by  
499 FACS (WT; n=12, *Fancd2*<sup>-/-</sup>; n=19, E13.5, \**P*<0.05). **(B)** IF of Cdkn1a(p21) after *in vitro*

500 culture 48h with SD208 10uM treatment of E13.5 FL WT and *Fancd2*<sup>-/-</sup> HSPC: (WT: n=6  
501 pups, 338 cells, WT+SD208: n=6, 132 cells, *Fancd2*<sup>-/-</sup> : n=3 pups, 333 cells *Fancd2*<sup>-/-</sup>  
502 +SD208: n=3 pups, 212 cells; \*\*\*\**P*<0.0001). (C) CFU assay and counted d14 GEMM  
503 colony frequency of E13.5 FL WT and *Fancd2*<sup>-/-</sup> with and without SD208 (WT: n=3,  
504 WT+SD208 n=3, *Fancd2*<sup>-/-</sup>: n=9, *Fancd2*<sup>-/-</sup>+SD208 n=9; \*\*\**P*<0.001). (D) IF of pChk1 S345  
505 after 48h of in vitro culture of E13.5 FL HSPC WT and *Fancd2*<sup>-/-</sup> with and without SD208  
506 (WT: n=6 pups, 357 cells, WT+SD208: n=4, 276 cells, *Fancd2*<sup>-/-</sup>: n=3 pups, 320 cells  
507 *Fancd2*<sup>-/-</sup>+SD208: n=3 pups, 318 cells; \*\*\*\**P*<0.0001).

508

509

510 **Figure S1** *Fancd2* deficiency limits HSC expansion in the fetal liver

511 (A,B) Immunophenotyping was performed to determine the frequency of (A) CD150<sup>+</sup> CD48<sup>+</sup>  
512 LSK, MPP2 and (B) CD150<sup>-</sup> CD48<sup>+</sup> LSK, MPP3,4 in WT and *Fancd2*<sup>-/-</sup> cell across select  
513 time points in ontogeny. A,B: E12.5 n=3<sup>+/+</sup>, 7<sup>-/-</sup>, E13.5 n=4<sup>+/+</sup>, 5<sup>-/-</sup>, E14.5 n=9<sup>+/+</sup>, 6<sup>-/-</sup>, E18.5  
514 n=7<sup>+/+</sup>, 3<sup>-/-</sup>, P21 n=5<sup>+/+</sup>, 6<sup>-/-</sup>, 10 Weeks(10W) n=4<sup>+/+</sup>, 4<sup>-/-</sup>, 30W n=3<sup>+/+</sup>, 3<sup>-/-</sup>). (C) Colony formation  
515 from 20,000 E12.5 FL cells (upperpanel) and BM cells at 9 weeks of age (lower panel). (D)  
516 *In vivo* serial transplantation using 5x10<sup>5</sup> E12.5 FL WT and *Fancd2*<sup>-/-</sup> cells, showed  
517 peripheral blood chimerism of total(left panel), myeloid(mid panel) and lymphoid(right panel)  
518 in primary (9 weeks from transplantation, upper panels) and secondary transplantation (9  
519 weeks from 2<sup>nd</sup> transplantation, lower panels). \**P*<0.05, \*\**P*<0.01, \*\*\**P*<0.001, \*\*\*\**P*<0.0001  
520 (E) p53(left panel) and p-p53 S15(right panel) protein volume at 9 weeks of HSC, MPP2,  
521 MPP3,4 and MPP total from transplantation of E12.5 FL WT and *Fancd2*<sup>-/-</sup> (Fig. 1F) were  
522 detected by flowcytometry (WT; n=4, *Fancd2*<sup>-/-</sup>; n=4).

523

524 **Figure S2** *Fancd2*<sup>-/-</sup> FL HSC showed replication stress response

525 (A) IF of Rpa70 and measured nuclear localized MFI at E13.5 FL WT and *Fancd2*<sup>-/-</sup> HSPC  
526 (WT; n=10 pups, 227 cells, *Fancd2*<sup>-/-</sup>; n=3 pups, 120 cells). (B) mRNA expression of *Mcm2*-  
527 7, *Cdk1,2,4,6*, *Cdc7*, *Dbf4* of WT and *Fancd2*<sup>-/-</sup> in E14.5 FL HSPC (E14.5 WT; n=4, *Fancd2*<sup>-/-</sup>  
528 <sup>-/-</sup>; n=3). (C) *Cdc7* protein volume expression in E13.5 WT and *Fancd2*<sup>-/-</sup> HSC (WT; n=11,  
529 *Fancd2*<sup>-/-</sup>; n=11). (D) IF of S9.6 and measured nuclear localized MFI at E14.5 FL WT and  
530 *Fancd2*<sup>-/-</sup> HSPC (WT; n=10 pups, 227 cells, *Fancd2*<sup>-/-</sup>; n=3 pups, 120 cells). (E) IF of  $\gamma$ H2AX

531 and measured nuclear localized MFI at E14.5 FL WT and *Fancd2*<sup>-/-</sup> HSPC (left panel; WT;  
532 n=2 pups, 83 cells, *Fancd2*<sup>-/-</sup>; n=2 pups, 84 cells) and ex vivo 1 hour cultured with or without  
533 CPT (50ug/ml) (right panel; WT; n=1 pup, 12 cells, *Fancd2*<sup>-/-</sup>; n=2 pups, 46 cells, WT+CPT;  
534 n=1 pup, 12 cells, *Fancd2*<sup>-/-</sup>+CPT; n=2 pups, 11 cells).

# FIG 1

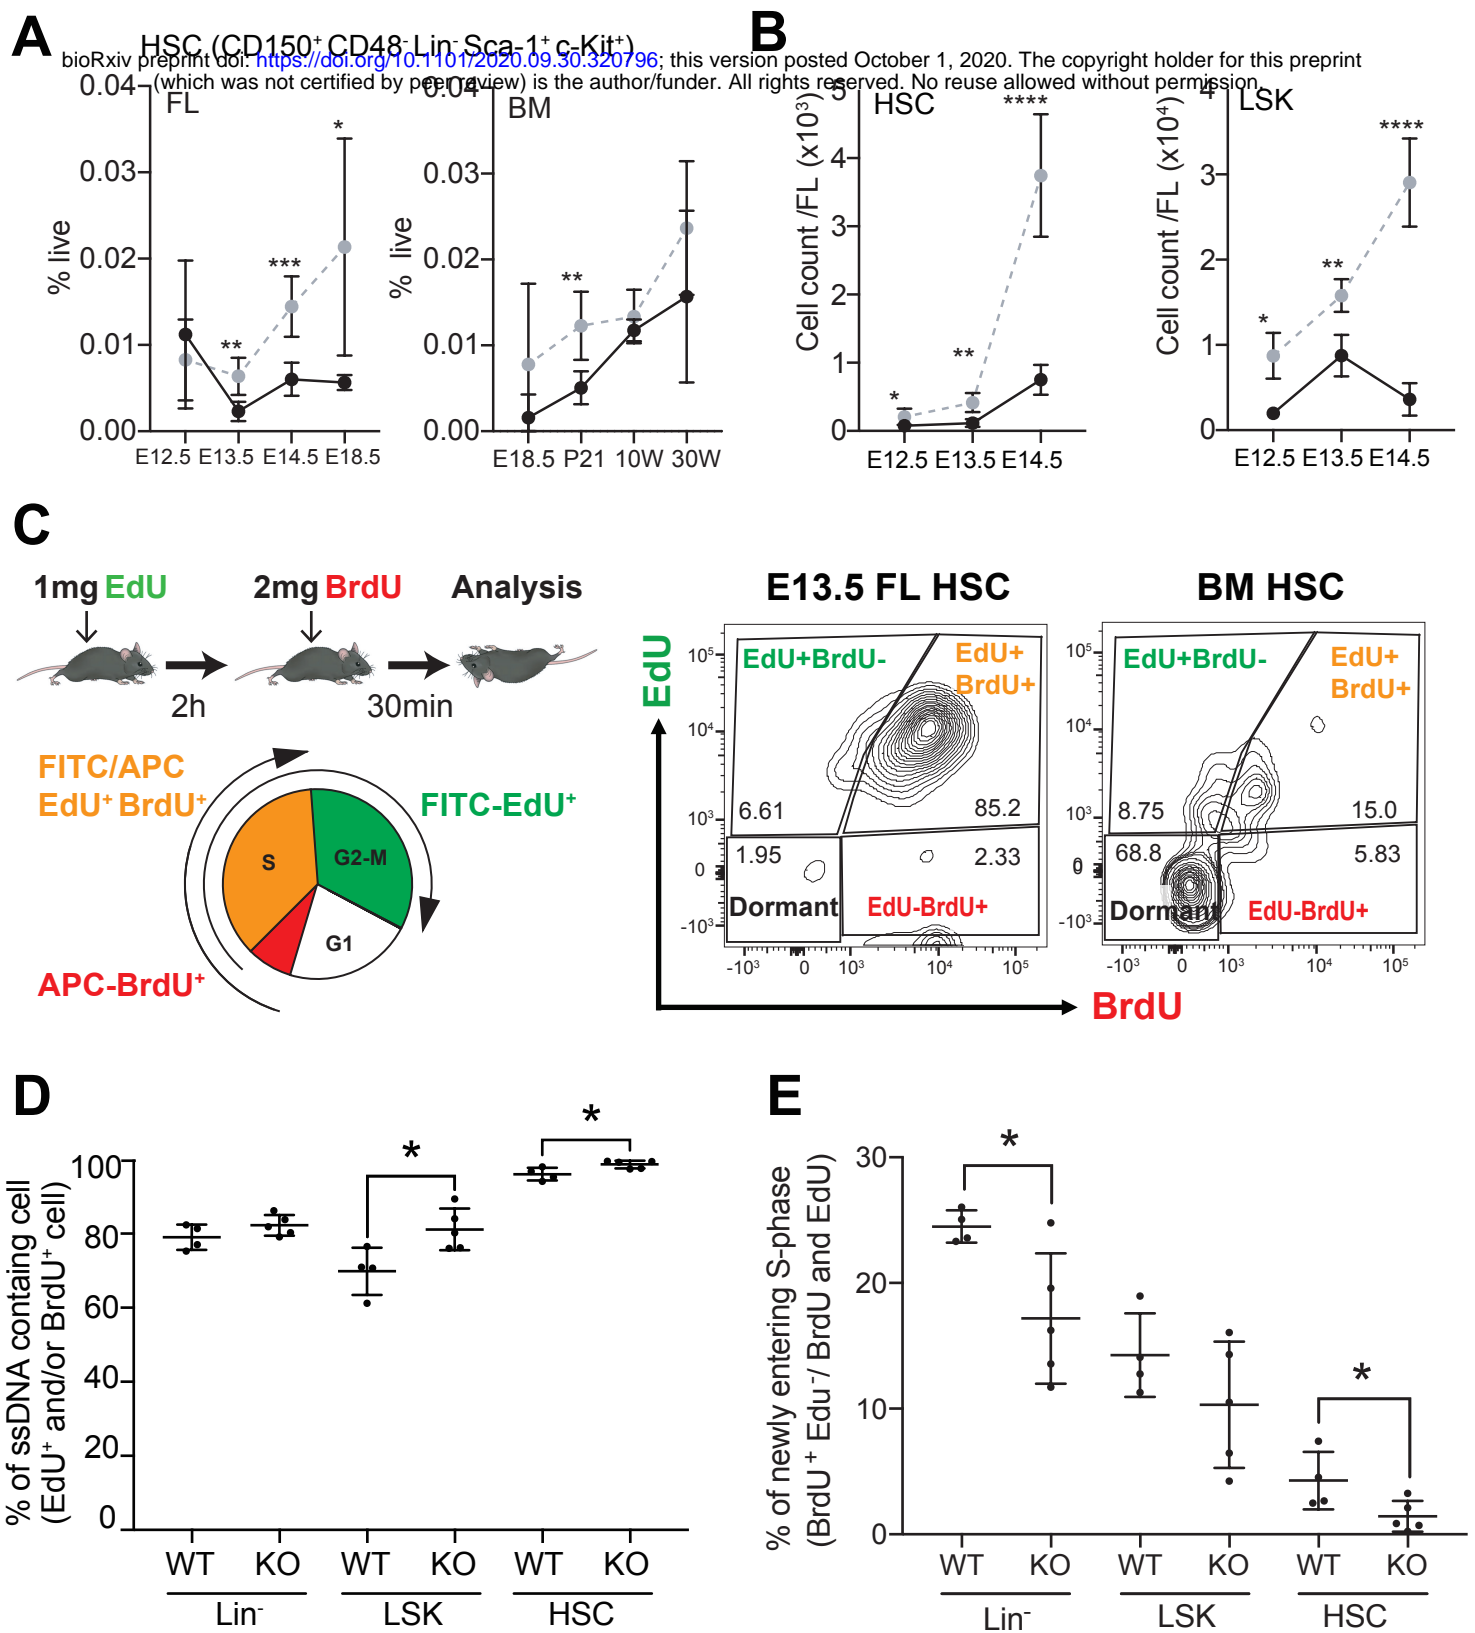

**FIG. 2**

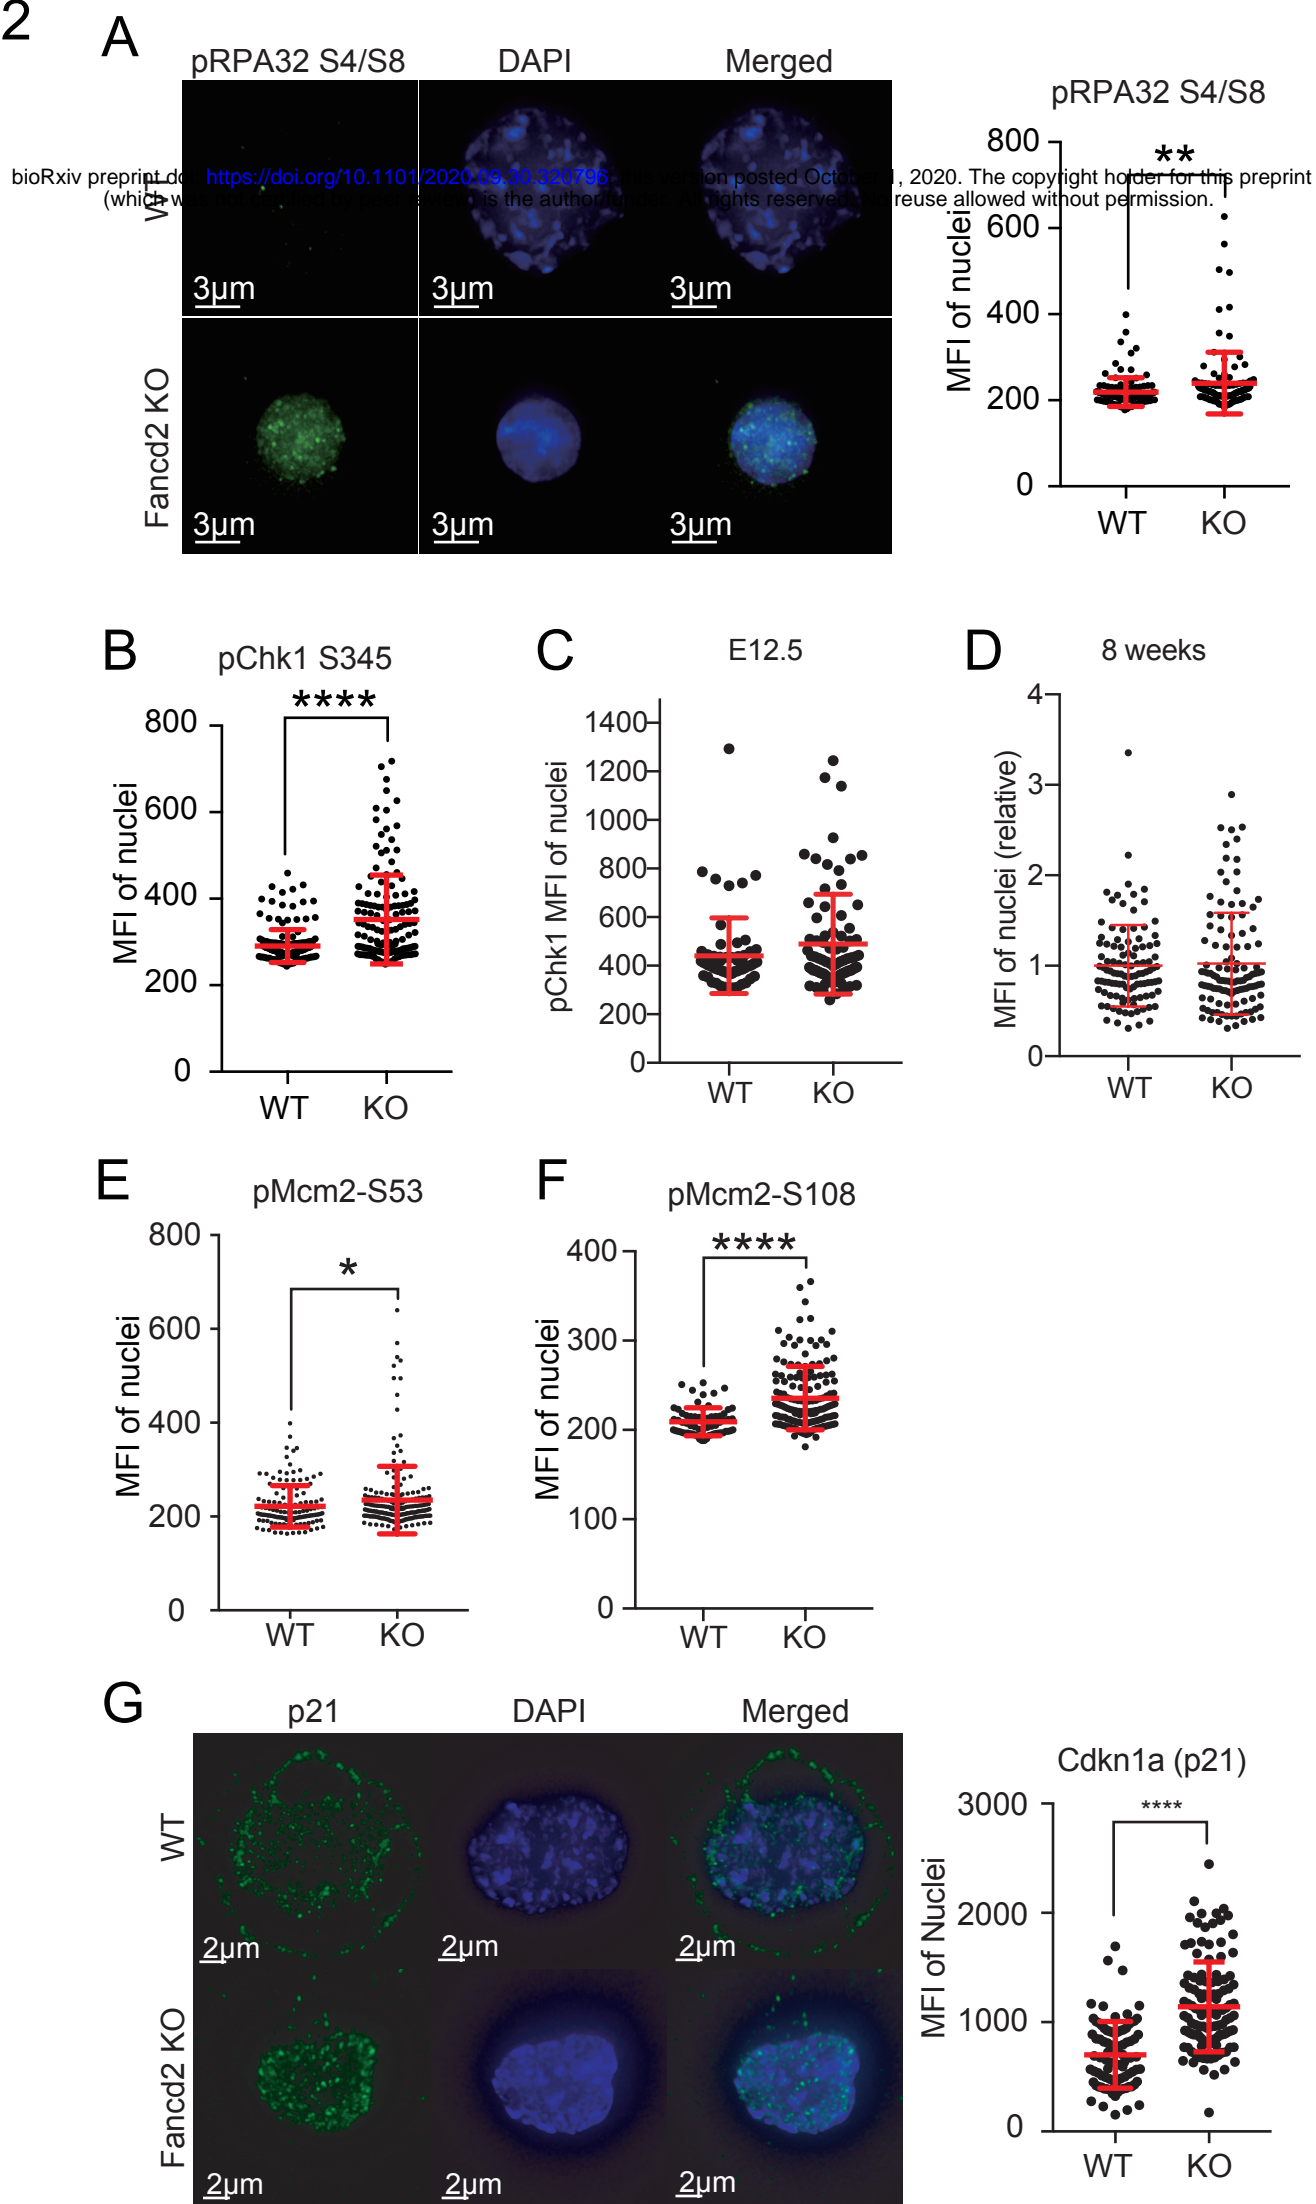

# FIG. 3

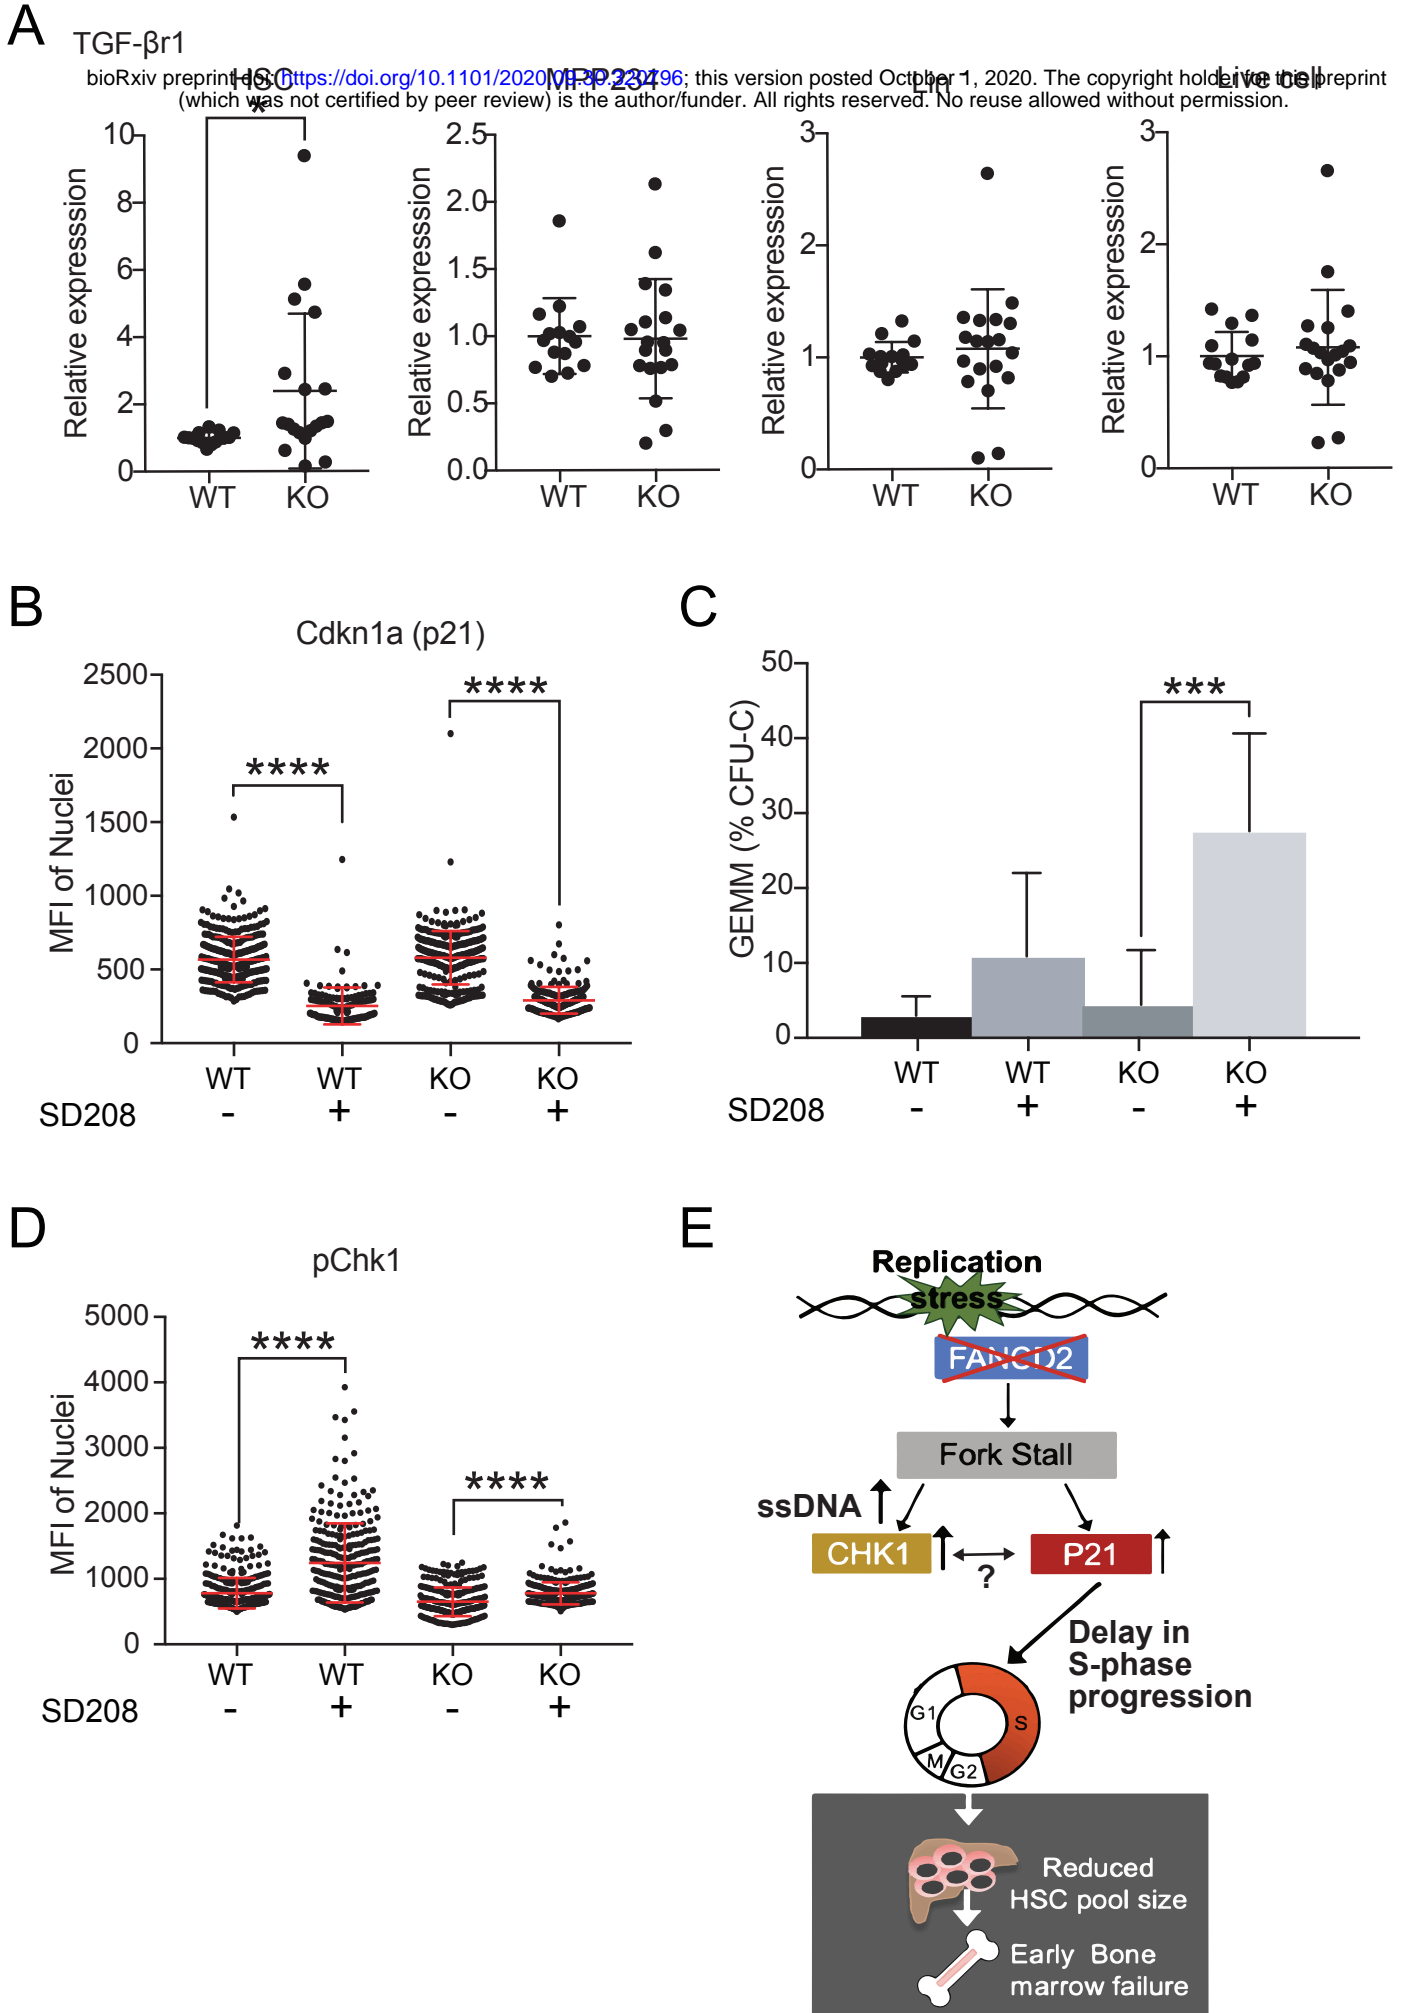



# FIG S1

● WT    ● Fancd2 KO

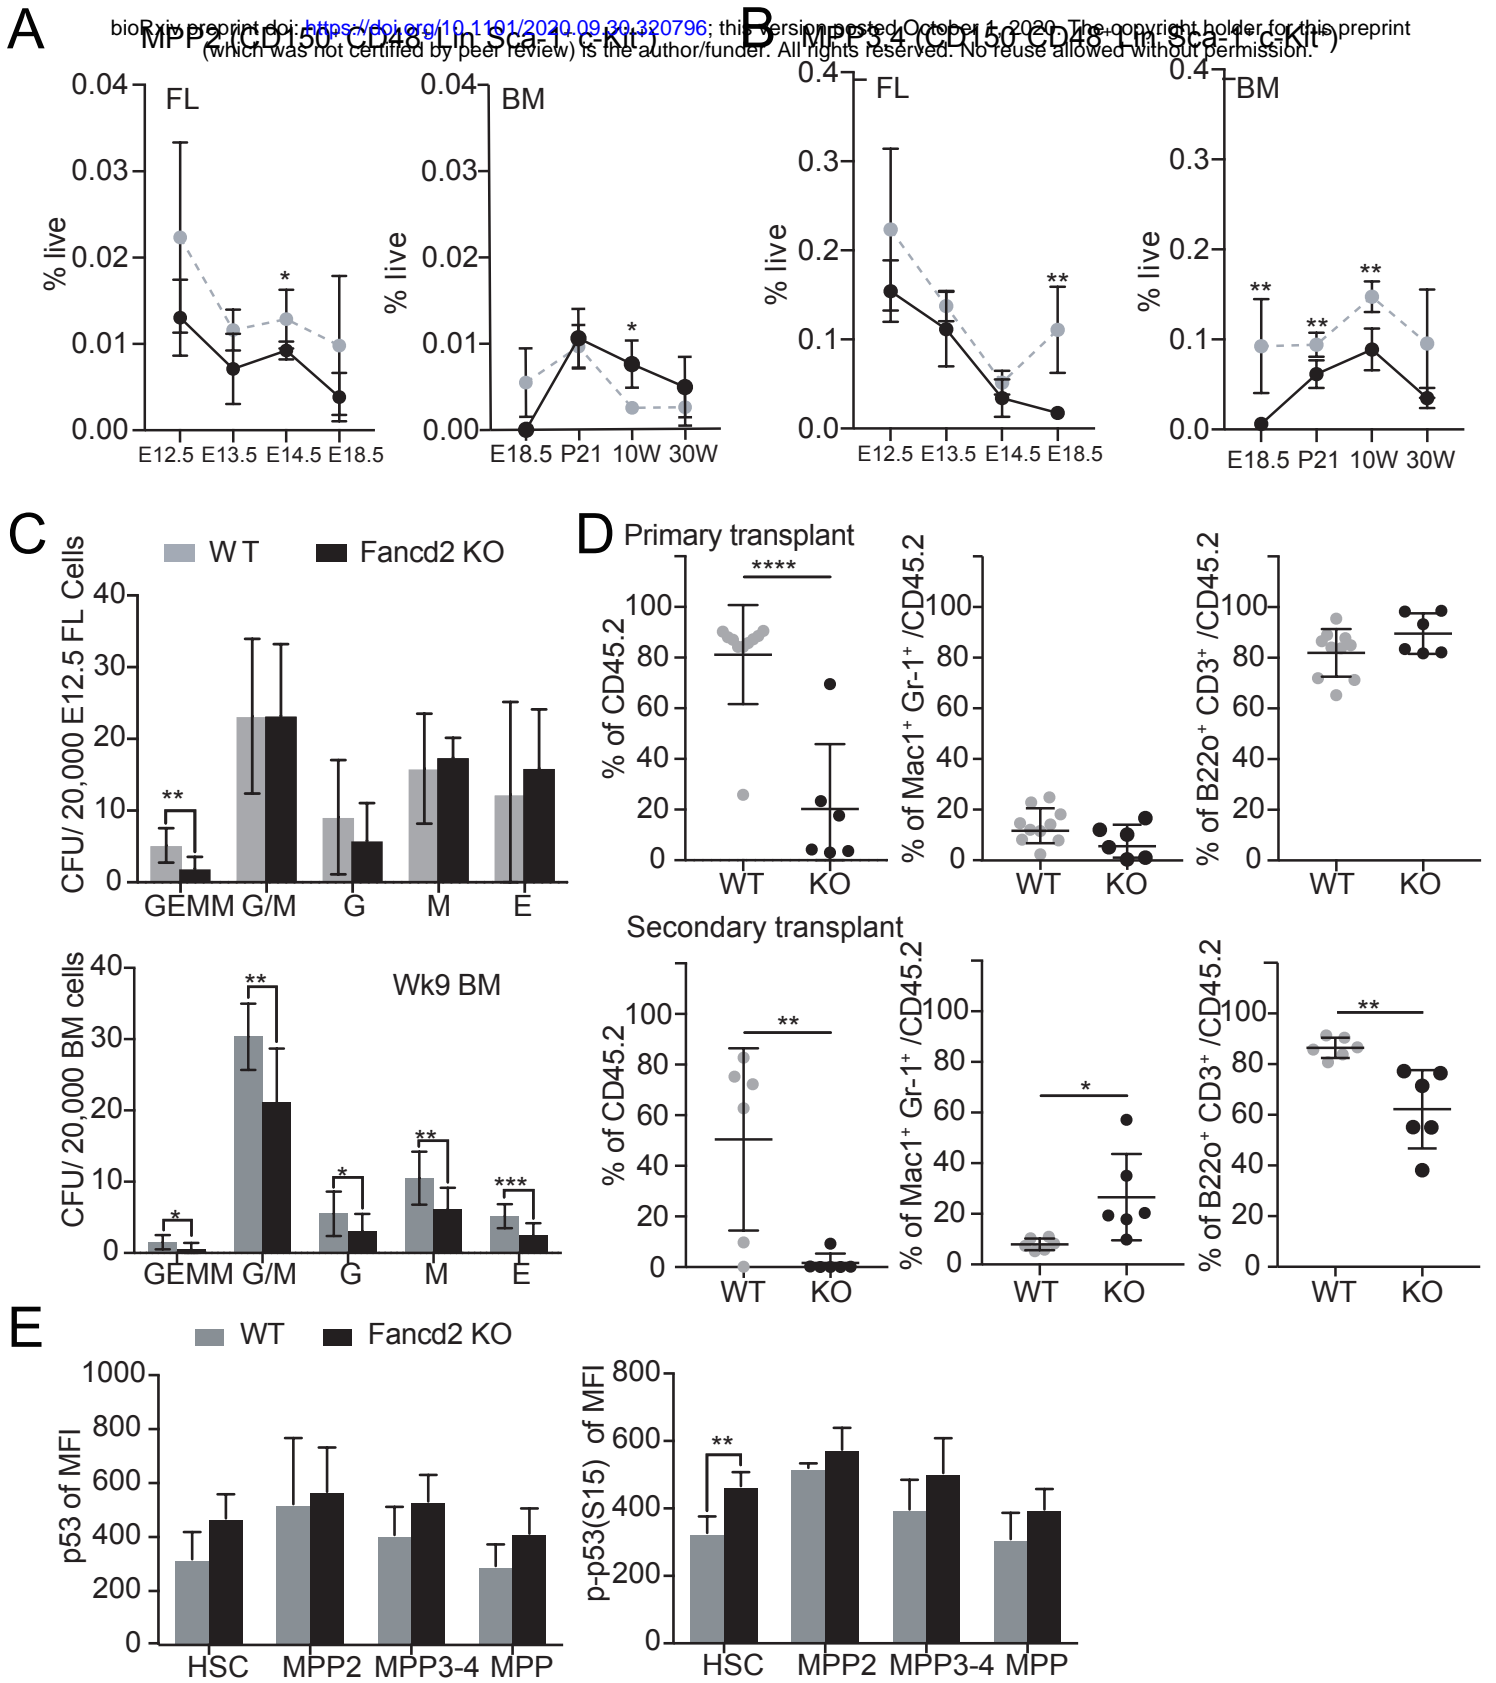

# FIG. S2

## A

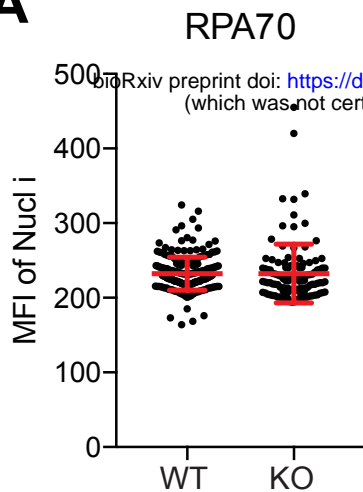

bioRxiv preprint doi: <https://doi.org/10.1101/2020.09.30.320796>; this version posted October 1, 2020. The copyright holder for this preprint (which was not certified by peer review) is the author/funder. All rights reserved. No reuse allowed without permission.

## B

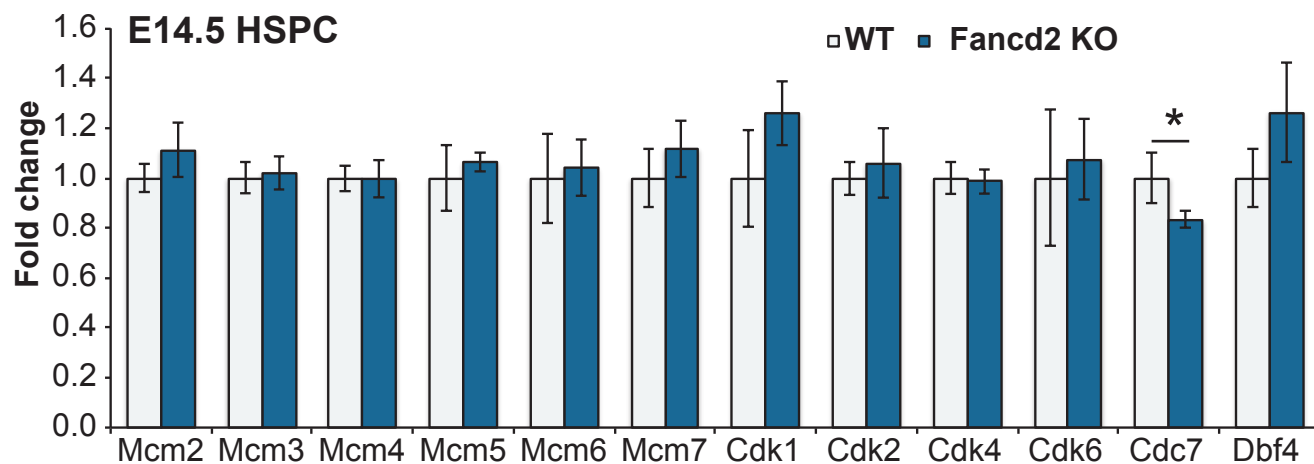

## C

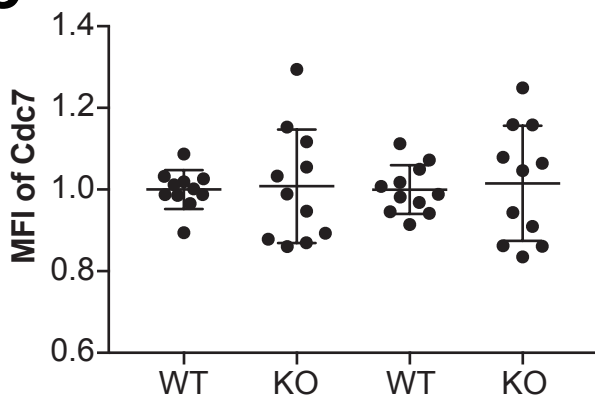

## D

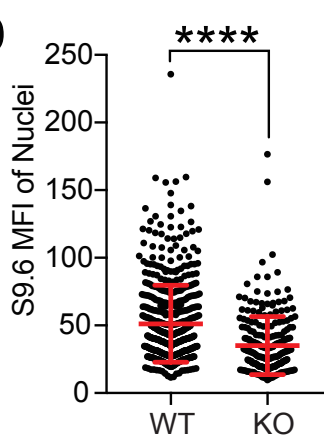

## E

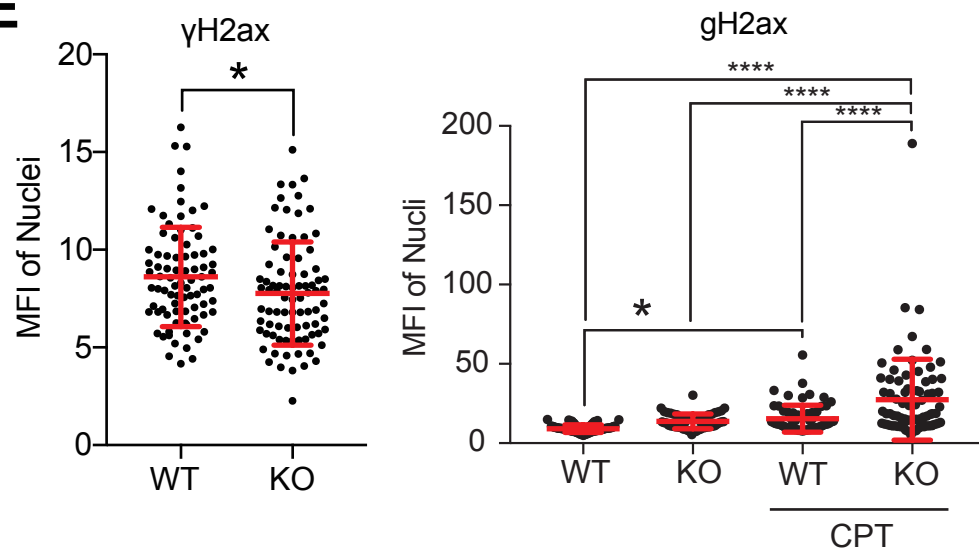

## Supplemental Table 1

| Antibody                    | Manufacturer              | Catalog. No. | Dilution | Usage         |
|-----------------------------|---------------------------|--------------|----------|---------------|
| B220 <sub>APC</sub>         | Biologend                 | 103211       | 1:250,   | Lineage (Lin) |
| B220 <sub>PE</sub>          | BD                        | 12-0452-82   | 1:250,   | Lineage (Lin) |
| c-Kit <sub>APC</sub>        | BD                        | 17-1171-82   | 1:100,   |               |
| c-Kit <sub>BV785</sub>      | Biologend                 | 105841       | 1:100,   |               |
| c-Kit <sub>PE</sub>         | Biologend                 | 105808       | 1:100,   |               |
| CD150 <sub>PECy7</sub>      | Biologend                 | 115914       | 1:100,   |               |
| CD3 <sub>APC</sub>          | Biologend                 | 100235       | 1:250,   | Lineage (Lin) |
| CD3 <sub>PE</sub>           | BD                        | 12-0031-82   | 1:250,   | Lineage (Lin) |
| CD4 <sub>APC</sub>          | Biologend                 | 100412       | 1:250,   | Lineage (Lin) |
| CD4 <sub>PE</sub>           | BD                        | 12-0041-82   | 1:250,   | Lineage (Lin) |
| CD48 <sub>PerCp-Cy5.5</sub> | Biologend                 | 103422       | 1:100,   |               |
| CD5 <sub>APC</sub>          | Biologend                 | 100626       | 1:250,   | Lineage (Lin) |
| CD5 <sub>PE</sub>           | BD                        | 12-0051-82   | 1:250,   | Lineage (Lin) |
| Gr-1 <sub>APC</sub>         | Biologend                 | 108411       | 1:250,   | Lineage (Lin) |
| Gr-1 <sub>PE</sub>          | BD                        | 12-5931-82   | 1:250,   | Lineage (Lin) |
| Sca-1 <sub>APCCy7</sub>     | Biologend                 | 108125       | 1:100,   |               |
| Ter119 <sub>APC</sub>       | Biologend                 | 116211       | 1:250,   | Lineage (Lin) |
| Ter119 <sub>PE</sub>        | BD                        | 12-5921-82   | 1:250,   | Lineage (Lin) |
| p21 <sub>AF488 (F-5)</sub>  | SANTA CRUZ                | sc-6246      | 1:50-200 |               |
| gH2ax <sub>AF488</sub>      | Biologend                 | 613405       | 1:50,    |               |
| Cdc7                        | Abcam                     | ab108332     | 1:50,    |               |
| pChk1 <sub>S345</sub>       | Cell Signaling Technology | 2348         | 1:50,    |               |
| pRpa32 <sub>S4/S8</sub>     | Bethyl                    | A300-245A    | 1:500,   |               |
| pRPA70                      | Invitrogen                | PA5-21976    | 1:500,   |               |
| pMcm2 <sub>S53</sub>        | Bethyl                    | A300-756A    | 1:100,   |               |
| pMcm2 <sub>S108</sub>       | Bethyl                    | IHC-00014    | 1:500,   |               |
| p53 <sub>S15</sub>          | Cell Signaling Technology | 12571        |          |               |
| p53                         | Cell Signaling Technology | 32532        |          |               |
| Tgfr1-APC                   | R&D                       | FAB5871A     | 3:100,   |               |
| a-mouse IgG-AF488           | Thermo Fisher             | A-21202      | 1:1000,  |               |
| a-rabbit IgG-FITC           | SANTA CRUZ                | sc-2012      | 1:1000,  |               |
